# Supplementary material
Source: Royal Society of Chemistry journal article supplement (doi:10.1039/d6eb00050a)
Supplement: d6eb00050a1.pdf [file d6eb00050a1.pdf]

# Secondary alkali-metal salts in supporting electrolytes for lithium polysulfide flow batteries

Thomas J. Leckie,<sup>ab</sup> Calvin N. Turner,<sup>b</sup> Alan R. Kennedy,<sup>b</sup> Niall Dalton,<sup>c</sup> Pasidu Pallawela,<sup>c</sup>  
Stuart D. Robertson\*<sup>b</sup> and Edward Brightman\*<sup>a</sup>

---

<sup>a</sup> Department of Chemical & Process Engineering, University of Strathclyde, Glasgow, G1 1XJ, UK. E-mail: [edward.brightman@strath.ac.uk](mailto:edward.brightman@strath.ac.uk)

<sup>b</sup> Department of Pure & Applied Chemistry, University of Strathclyde, Glasgow, G1 1XL, UK. E-mail: [stuart.d.robertson@strath.ac.uk](mailto:stuart.d.robertson@strath.ac.uk)

<sup>c</sup> StorTera Ltd., Edinburgh, EH16 4BB, UK

## Supplementary Information

### Contents

1. Crystallographic Data
  - 1.1 General fitting and refinement data
  - 1.2 TFSINa·DME
  - 1.3 RbTFSI
  - 1.4 Bond Valence Sum calculations
2. NMR Spectra of MTFSI salts
3. ATR-IR Spectra of MTFSI salts
4. Cyclic Voltammetry
5. Equivalent Circuit Model
6. Li Anode - SEM-EDX Images & Spectra
7. Carbon Felt Cathode - SEM-EDX Images & Spectra

## 1. Crystallographic Data

### 1.1. General fitting and refinement data

**Table S1:** Selected crystallographic and refinement parameters

| <i>Compound</i>                        | <i>1 (TFSiNa-DME)</i>                                                          | <i>2 (RbTFSi)</i>                                              |
|----------------------------------------|--------------------------------------------------------------------------------|----------------------------------------------------------------|
| <i>CCDC ref. no.</i>                   | 2529359                                                                        | 2529360                                                        |
| <i>Formula</i>                         | C <sub>6</sub> H <sub>10</sub> F <sub>6</sub> NNaO <sub>6</sub> S <sub>2</sub> | C <sub>2</sub> F <sub>6</sub> NO <sub>4</sub> RbS <sub>2</sub> |
| <i>Formula Weight</i>                  | 393.26                                                                         | 365.62                                                         |
| <i>Crystal system</i>                  | Monoclinic                                                                     | Triclinic                                                      |
| <i>Space group</i>                     | P2 <sub>1</sub>                                                                | P-1                                                            |
| <i>Temp. (K)</i>                       | 100(2)                                                                         | 100(2)                                                         |
| <i>a (Å)</i>                           | 11.7450(6)                                                                     | 8.1792(5)                                                      |
| <i>b (Å)</i>                           | 9.8155(5)                                                                      | 10.6823(5)                                                     |
| <i>c (Å)</i>                           | 13.1950(6)                                                                     | 11.4178(7)                                                     |
| <i>α (°)</i>                           | 90                                                                             | 101.302(5)                                                     |
| <i>β (°)</i>                           | 104.079(5)                                                                     | 101.707(6)                                                     |
| <i>γ (°)</i>                           | 90                                                                             | 90.023(4)                                                      |
| <i>Volume (Å<sup>3</sup>)</i>          | 1475.47(13)                                                                    | 957.07(10)                                                     |
| <i>Z</i>                               | 4                                                                              | 4                                                              |
| <i>Collected Reflections</i>           | 10839                                                                          | 11581                                                          |
| <i>Independent Reflections</i>         | 4216                                                                           | 3603                                                           |
| <i>Observed Reflections</i>            | 3481                                                                           | 3217                                                           |
| <i>R<sub>int</sub></i>                 | 0.0463                                                                         | 0.0402                                                         |
| <i>2θ<sub>max</sub> (°)</i>            | 144.702                                                                        | 143.268                                                        |
| <i>No. Parameters</i>                  | 402                                                                            | 289                                                            |
| <i>S</i>                               | 1.145                                                                          | 1.071                                                          |
| <i>R [on F, obs refs only]</i>         | 0.0478                                                                         | 0.0523                                                         |
| <i>ωR [on F<sup>2</sup>, all data]</i> | 0.1421                                                                         | 0.1500                                                         |
| <i>Flack</i>                           | 0.50(4)                                                                        | n.a.                                                           |

## 1.2 TFSINa·DME

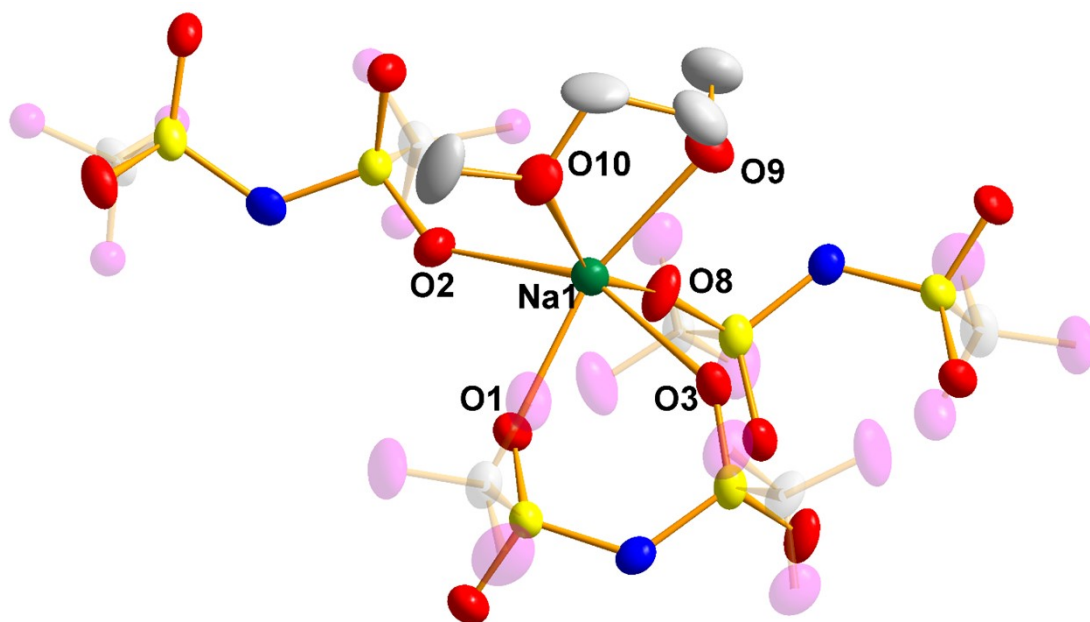

**Fig. S1** Part of the structure of TFSINa·DME complex showing coordination sphere at Na1, with hydrogen atoms omitted and thermal ellipsoids drawn at 50% probability level.

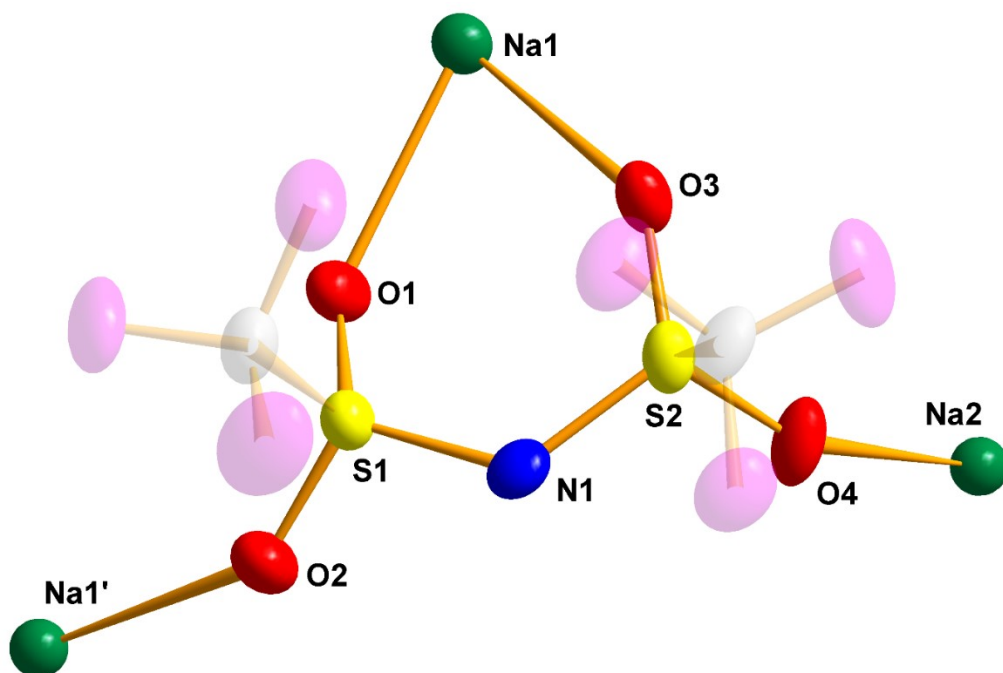

**Fig. S2** Part of the structure of TFSINa·DME showing TFSI ligand and its different interactions with Na cations to propagate polymer, with hydrogen atoms omitted and thermal ellipsoids drawn at 50% probability level.

**Table S2:** Selected bond lengths for TFSiNa·DME

| Bond    | Length (Å) | Bond    | Length (Å) | Bond  | Length (Å) |
|---------|------------|---------|------------|-------|------------|
| Na1-O1  | 2.355(7)   | Na2-O5  | 2.349(7)   | S1-N1 | 1.568(6)   |
| Na1-O3  | 2.383(7)   | Na2-O7  | 2.435(6)   | S2-N1 | 1.578(7)   |
| Na1-O8  | 2.327(6)   | Na2-O4  | 2.367(5)   | S1-O2 | 1.425(6)   |
| Na1-O9  | 2.377(7)   | Na2-O11 | 2.367(7)   | S2-O4 | 1.429(6)   |
| Na1-O10 | 2.397(6)   | Na2-O12 | 2.383(6)   | S3-N2 | 1.566(6)   |
| Na1-O2' | 2.379(6)   | Na2-O6' | 2.376(6)   | S4-N2 | 1.567(7)   |
| O1-S1   | 1.428(7)   | O5-S3   | 1.434(6)   | S3-O6 | 1.426(6)   |
| O3-S2   | 1.415(7)   | O7-S4   | 1.441(7)   | S4-O8 | 1.433(6)   |

**Table S3:** Selected bond angles for TFSiNa·DME

| Bonds      | Angle (°) | Bonds      | Angle (°) | Bonds       | Angle (°) | Bonds       | Angle (°) |
|------------|-----------|------------|-----------|-------------|-----------|-------------|-----------|
| O1-Na1-O3  | 74.2(2)   | O5-Na2-O7  | 73.5(2)   | O3-Na1-O2'  | 151.9(3)  | O7-Na2-O6'  | 153.3(3)  |
| O1-Na1-O8  | 101.2(3)  | O5-Na2-O4  | 108.3(3)  | O8-Na1-O9   | 86.3(2)   | O4-Na2-O11  | 95.2(3)   |
| O1-Na1-O9  | 157.3(2)  | O5-Na2-O11 | 146.3(2)  | O8-Na1-O10  | 152.3(3)  | O4-Na2-O12  | 155.2(3)  |
| O1-Na1-O10 | 105.7(2)  | O5-Na2-O12 | 94.1(2)   | O8-Na1-O2'  | 88.9(2)   | O4-Na2-O6'  | 84.3(2)   |
| O1-Na1-O2' | 78.6(2)   | O5-Na2-O6' | 84.8(2)   | O9-Na1-O10  | 71.2(2)   | O11-Na2-O12 | 69.9(2)   |
| O3-Na1-O8  | 89.3(2)   | O7-Na2-O4  | 87.8(2)   | O9-Na1-O2'  | 123.3(3)  | O11-Na2-O6' | 122.3(3)  |
| O3-Na1-O9  | 84.5(2)   | O7-Na2-O11 | 83.8(2)   | O10-Na1-O2' | 90.2(2)   | O12-Na2-O6' | 87.3(2)   |
| O3-Na1-O10 | 103.9(2)  | O7-Na2-O12 | 109.3(2)  | S1-N1-S2    | 124.9(5)  | S3-N2-S4    | 126.0(5)  |

### 1.3 RbTFSI

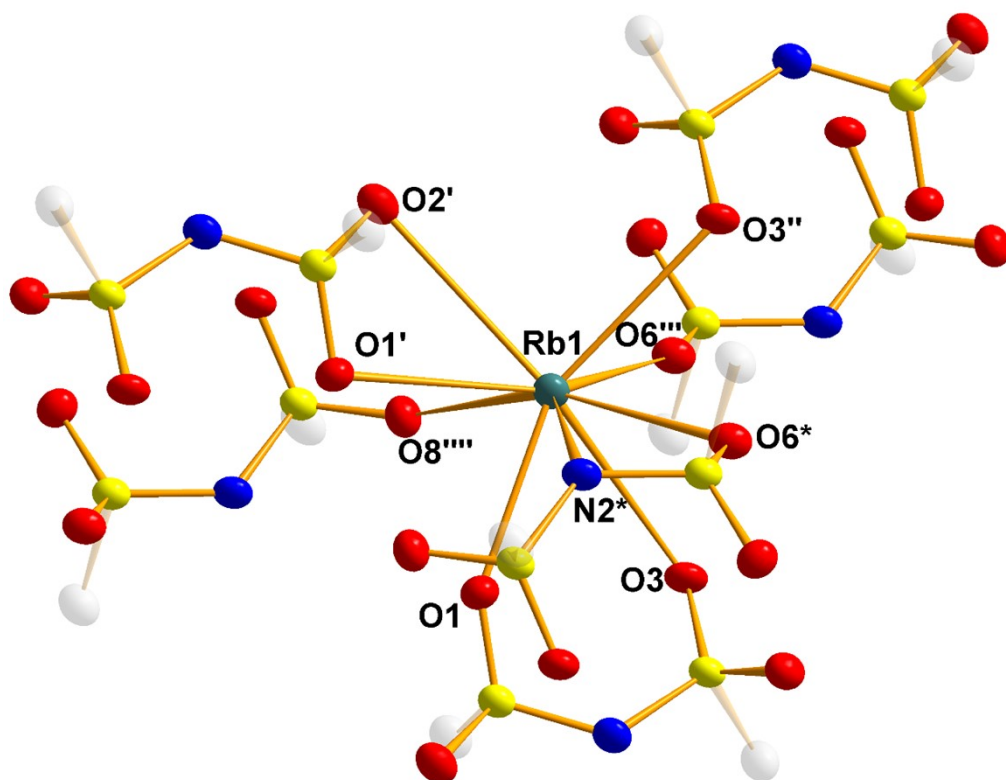

**Fig. S3** Part of the structure of RbTFSI showing coordination sphere at Rb1, with hydrogen and fluorine atoms omitted and thermal ellipsoids drawn at 50% probability level.

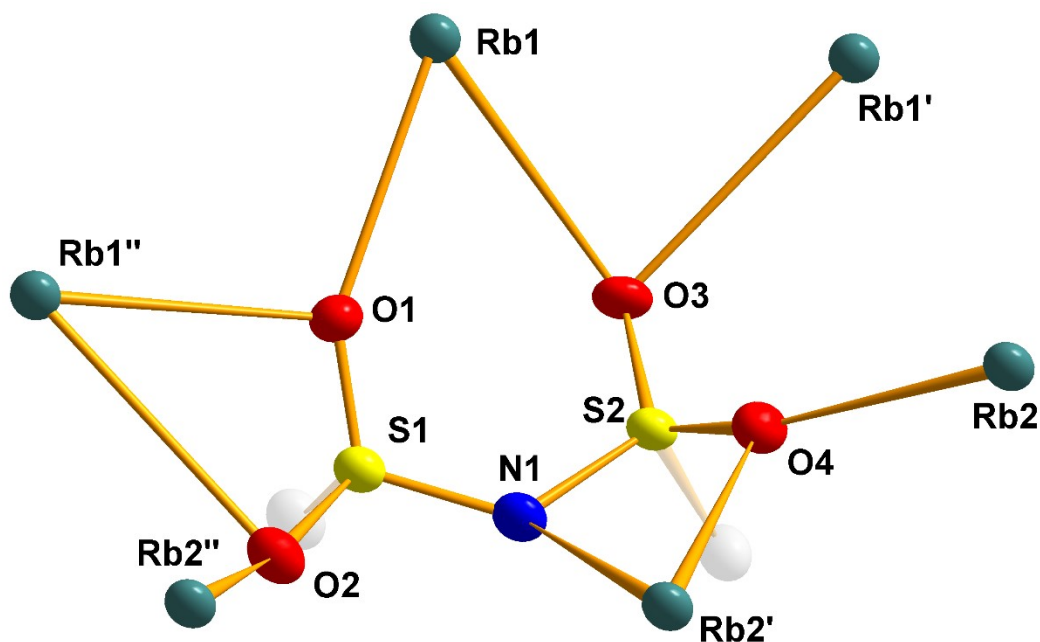

**Fig. S4** Part of the structure of RbTFSI showing TFSI ligand and its different interactions with Rb cations to propagate polymer, with hydrogen and fluorine atoms omitted and thermal ellipsoids drawn at 50% probability level.

**Table S4:** Selected bond lengths for complex 2

| <b>Bond</b> | <b>Length (Å)</b> | <b>Bond</b> | <b>Length (Å)</b> | <b>Bond</b> | <b>Length (Å)</b> |
|-------------|-------------------|-------------|-------------------|-------------|-------------------|
| Rb1-O1      | 2.794(3)          | Rb2-O7      | 2.789(3)          | O3-S2       | 1.430(3)          |
| Rb1-O3      | 3.161(3)          | Rb2-O5      | 3.226(3)          | S1-N1       | 1.572(4)          |
| Rb1-O1'     | 2.966(3)          | Rb2-O7'     | 2.977(3)          | S2-N1       | 1.584(4)          |
| Rb1-O2'     | 3.327(3)          | Rb2-O8'     | 3.305(3)          | S1-O2       | 1.432(3)          |
| Rb1-O3''    | 3.149(3)          | Rb2-O5''    | 3.163(3)          | S2-O4       | 1.438(3)          |
| Rb1-O6'''   | 2.834(3)          | Rb2-O4'''   | 2.813(3)          | O7-S4       | 1.440(3)          |
| Rb1-O6*     | 2.946(3)          | Rb2-O4*     | 2.964(3)          | S3-N2       | 1.590(4)          |
| Rb1-N2*     | 3.314(4)          | Rb2-N1*     | 3.212(4)          | S4-N2       | 1.565(3)          |
| Rb1-O8''''  | 2.969(3)          | Rb2-O2''''  | 2.970(3)          | S3-O6       | 1.433(3)          |
| O1-S1       | 1.435(3)          | O5-S3       | 1.432(3)          | S4-O8       | 1.433(3)          |

## 1.4 Bond Valence Sum Calculations

The bond valence sums for each metal centre in RbTFSI and TFSINa·DME are calculated using:

$$V = \sum v_i = \sum \exp\left(\frac{R_0 - R_i}{B}\right)$$

Where  $v_i$  is the individual bond valence,  $R_0 = 2.263 \text{ \AA}$  for Rb-O,  $2.37 \text{ \AA}$  for Rb-N, and  $1.803 \text{ \AA}$  for Na-O,  $R_i$  is the observed bond distance and  $B = 0.37 \text{ \AA}$ .

**Table S5:** Bond valence values for Rb1 from RbTFSI giving a bond valence sum of 1.22

| Bond              | $R_i$    | $R_0$ | $[R_0-R]/B$ | $v_i$ |
|-------------------|----------|-------|-------------|-------|
| <b>Rb1-O1</b>     | 2.794(3) | 2.263 | -1.435      | 0.238 |
| <b>Rb1-O3</b>     | 3.161(3) | 2.263 | -2.427      | 0.088 |
| <b>Rb1-O1'</b>    | 2.966(3) | 2.263 | -1.900      | 0.150 |
| <b>Rb1-O2'</b>    | 3.327(3) | 2.263 | -2.876      | 0.056 |
| <b>Rb1-O3''</b>   | 3.149(3) | 2.263 | -2.395      | 0.091 |
| <b>Rb1-O6'''</b>  | 2.834(3) | 2.263 | -1.543      | 0.214 |
| <b>Rb1-O6*</b>    | 2.946(3) | 2.263 | -1.846      | 0.158 |
| <b>Rb1-N2*</b>    | 3.314(4) | 2.37  | -2.551      | 0.078 |
| <b>Rb1-O8''''</b> | 2.969(3) | 2.263 | -1.908      | 0.148 |

**Table S6:** Bond valence values for Rb2 from RbTFSI giving a bond valence sum of 1.23

| Bond              | $R_i$    | $R_0$ | $[R_0-R]/B$ | $v_i$ |
|-------------------|----------|-------|-------------|-------|
| <b>Rb2-O7</b>     | 2.789(3) | 2.263 | -1.422      | 0.241 |
| <b>Rb2-O5</b>     | 3.226(3) | 2.263 | -2.603      | 0.074 |
| <b>Rb2-O7'</b>    | 2.977(3) | 2.263 | -1.930      | 0.145 |
| <b>Rb2-O8'</b>    | 3.305(3) | 2.263 | -2.816      | 0.060 |
| <b>Rb2-O5''</b>   | 3.163(3) | 2.263 | -2.432      | 0.088 |
| <b>Rb2-O4'''</b>  | 2.813(3) | 2.263 | -1.486      | 0.226 |
| <b>Rb2-O4*</b>    | 2.964(3) | 2.263 | -1.895      | 0.150 |
| <b>Rb2-N1*</b>    | 3.212(4) | 2.370 | -2.276      | 0.103 |
| <b>Rb2-O2''''</b> | 2.970(3) | 2.263 | -1.911      | 0.148 |

**Table S7:** Bond valence values for Na1 from TFSINa·DME giving a bond valence sum of 1.30

| Bond           | $R_i$    | $R_0$ | $[R_0-R]/B$ | $v_i$ |
|----------------|----------|-------|-------------|-------|
| <b>Na1-O1</b>  | 2.355(7) | 1.803 | -1.492      | 0.225 |
| <b>Na1-O3</b>  | 2.383(7) | 1.803 | -1.568      | 0.209 |
| <b>Na1-O8</b>  | 2.327(6) | 1.803 | -1.416      | 0.243 |
| <b>Na1-O9</b>  | 2.377(7) | 1.803 | -1.551      | 0.212 |
| <b>Na1-O10</b> | 2.397(6) | 1.803 | -1.605      | 0.201 |
| <b>Na1-O2'</b> | 2.379(6) | 1.803 | -1.557      | 0.211 |

**Table S8:** Bond valence values for Na2 from TFSINa·DME giving a bond valence sum of 1.27

| <b>Bond</b>    | <b>R<sub>i</sub></b> | <b>R<sub>0</sub></b> | <b>[R<sub>0</sub>-R]/B</b> | <b>v<sub>i</sub></b> |
|----------------|----------------------|----------------------|----------------------------|----------------------|
| <b>Na2-O5</b>  | 2.349(7)             | 1.803                | -1.476                     | 0.229                |
| <b>Na2-O7</b>  | 2.435(6)             | 1.803                | -1.708                     | 0.181                |
| <b>Na2-O4</b>  | 2.367(5)             | 1.803                | -1.524                     | 0.218                |
| <b>Na2-O11</b> | 2.367(7)             | 1.803                | -1.524                     | 0.218                |
| <b>Na2-O12</b> | 2.383(6)             | 1.803                | -1.568                     | 0.209                |
| <b>Na2-O6'</b> | 2.376(6)             | 1.803                | -1.549                     | 0.213                |

## 2. NMR spectra of synthesised MTFSI salts

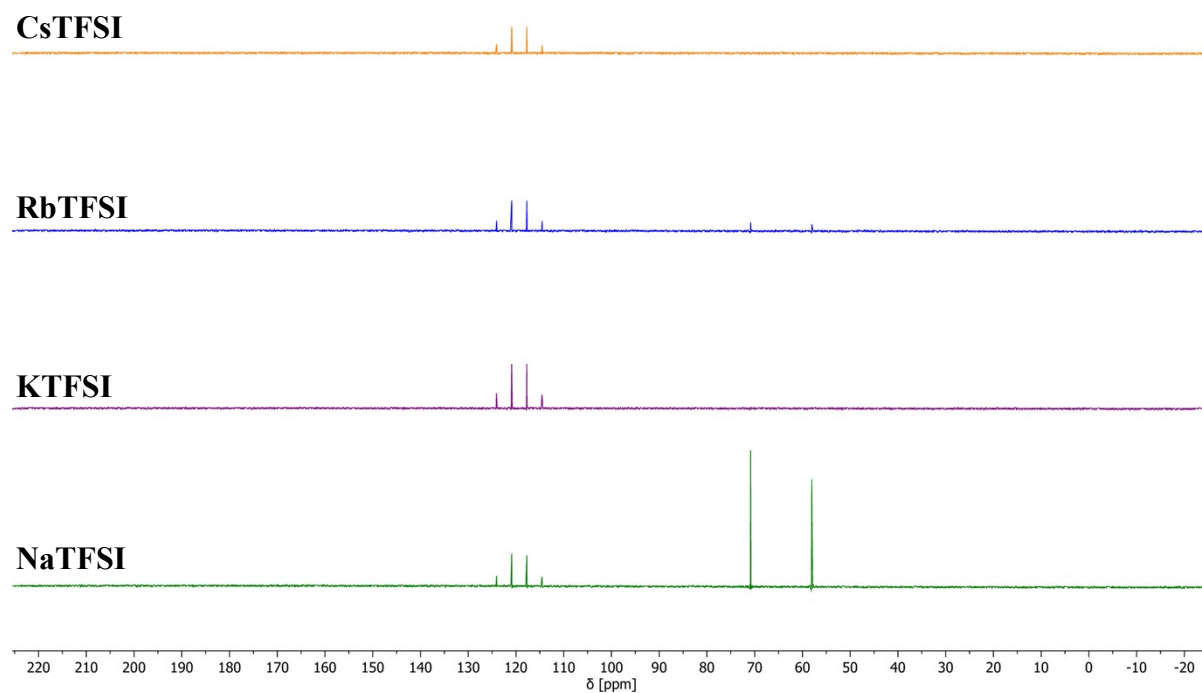

Fig. S5  $^{13}\text{C}\{^1\text{H}\}$  NMR spectrum (100.62 MHz,  $\text{D}_2\text{O}$ ) of synthesized MTFSI salts

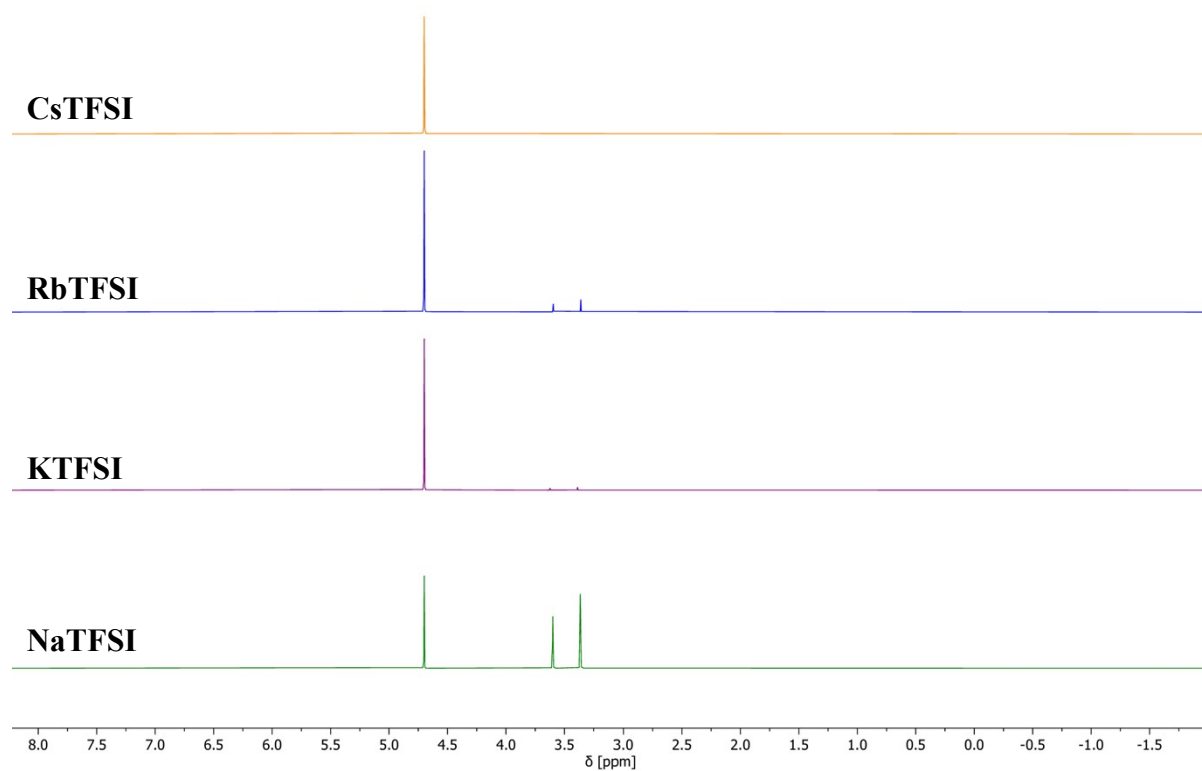

Fig. S6  $^1\text{H}$  NMR spectrum (400.13 MHz,  $\text{D}_2\text{O}$ ) of synthesized MTFSI salts

NMR Spectra Assignments:

NaTFSI:  $^{13}\text{C}$  NMR (101 MHz,  $\text{D}_2\text{O}$ ):  $\delta = 118.77$  (q,  $^1J_{\text{C-F}} = 323.2$  Hz,  $\text{CF}_3$ ), 70.78 ( $\text{RCH}_2\text{-OR}$ ), 58.05 ( $\text{RO-CH}_3$ ).  
 $^1\text{H}$  NMR (400 MHz,  $\text{D}_2\text{O}$ ):  $\delta = 3.60$  (s, 2H,  $\text{RCH}_2\text{-OR}$ ), 3.37 (s, 3H,  $\text{RO-CH}_3$ ).

KTFSI:  $^{13}\text{C}$  NMR (101 MHz,  $\text{D}_2\text{O}$ ):  $\delta = 119.32$  (q,  $^1J_{\text{C-F}} = 319.7$  Hz,  $\text{CF}_3$ ).  
 $^1\text{H}$  NMR (400 MHz,  $\text{D}_2\text{O}$ ):  $\delta = 3.62$  (s, 2H,  $\text{RCH}_2\text{-OR}$ ), 3.39 (s, 3H,  $\text{RO-CH}_3$ ).

RbTFSI:  $^{13}\text{C}$  NMR (101 MHz,  $\text{D}_2\text{O}$ ):  $\delta = 119.29$  (q,  $^1J_{\text{C-F}} = 319.6$  Hz,  $\text{CF}_3$ ), 70.85 ( $\text{RCH}_2\text{-OR}$ ), 58.04 ( $\text{RO-CH}_3$ ).  
 $^1\text{H}$  NMR (400 MHz,  $\text{D}_2\text{O}$ ):  $\delta = 3.60$  (s, 2H,  $\text{RCH}_2\text{-OR}$ ), 3.36 (s, 3H,  $\text{RO-CH}_3$ ).

CsTFSI:  $^{13}\text{C}$  NMR (101 MHz,  $\text{D}_2\text{O}$ ):  $\delta = 119.30$  (q,  $^1J_{\text{C-F}} = 319.5$  Hz,  $\text{CF}_3$ ).  
 $^1\text{H}$  NMR (400 MHz,  $\text{D}_2\text{O}$ ): Only solvent peak observed

### 3. ATR-IR spectra of MTFSI salts

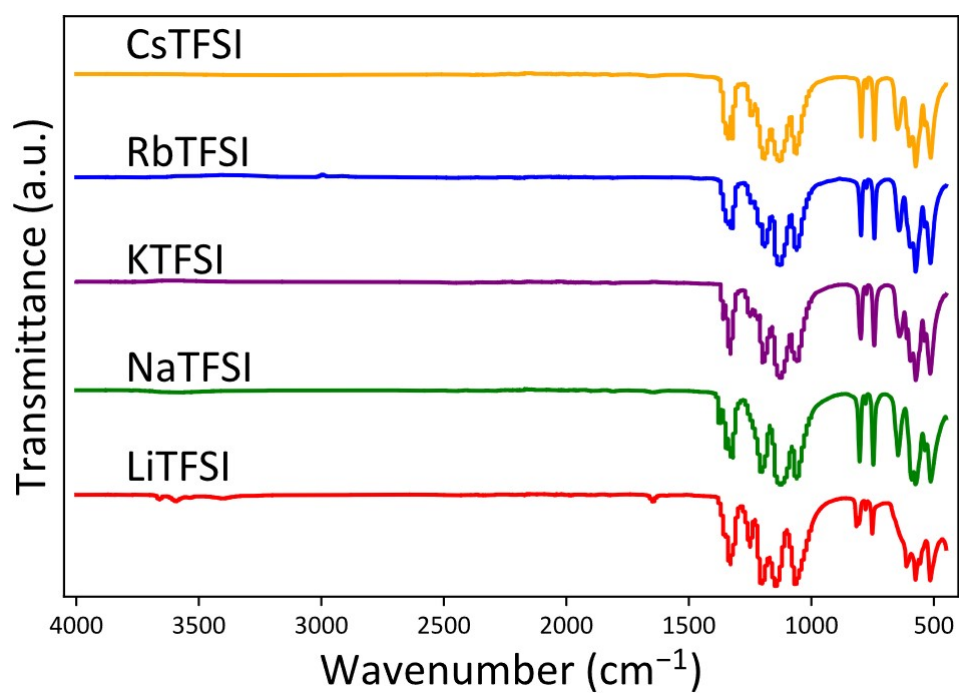

Fig. S7 Stacked ATR-IR spectra of MTFSI salts

### 4. Cyclic Voltammetry

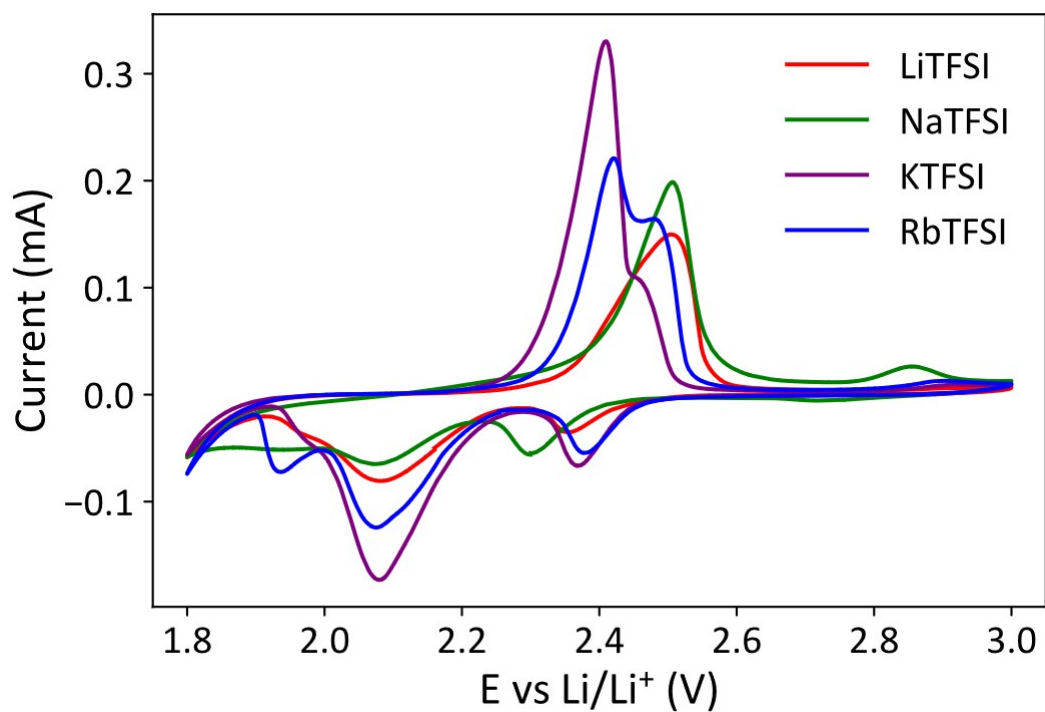

Fig. S8 CVs of different MTFSI salts at 0.05 mV s<sup>-1</sup> on shared axes. Data represented as a stacked plot (Fig. 2a) in full text

## 5. Equivalent Circuit Model

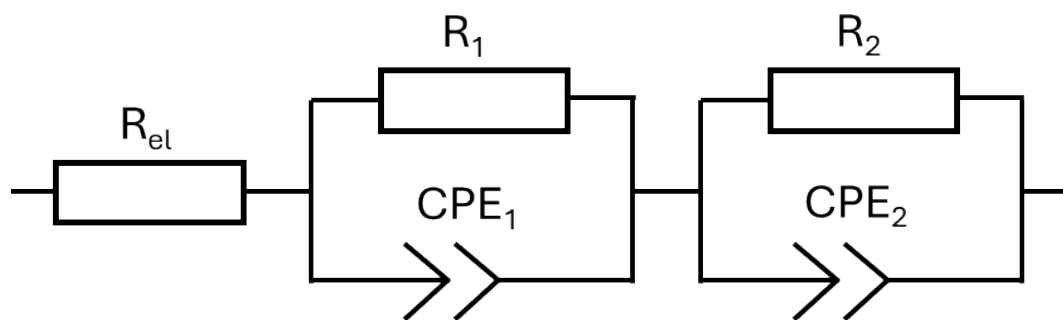

**Fig. S9** Equivalent circuit model used for EIS data fitting in ZView4 software ( $R_{el}$  = Electrolyte Resistance,  $R_1$  = SEI layer charge transfer resistance,  $CPE_1$  = Constant Phase Element for modelling capacitance of SEI charge transfer process,  $R_2$  = LiPS charge transfer resistance,  $CPE_2$  = Constant Phase Element for modelling capacitance of LiPS charge transfer)

## 6. Li Anode - SEM-EDX Images & Spectra

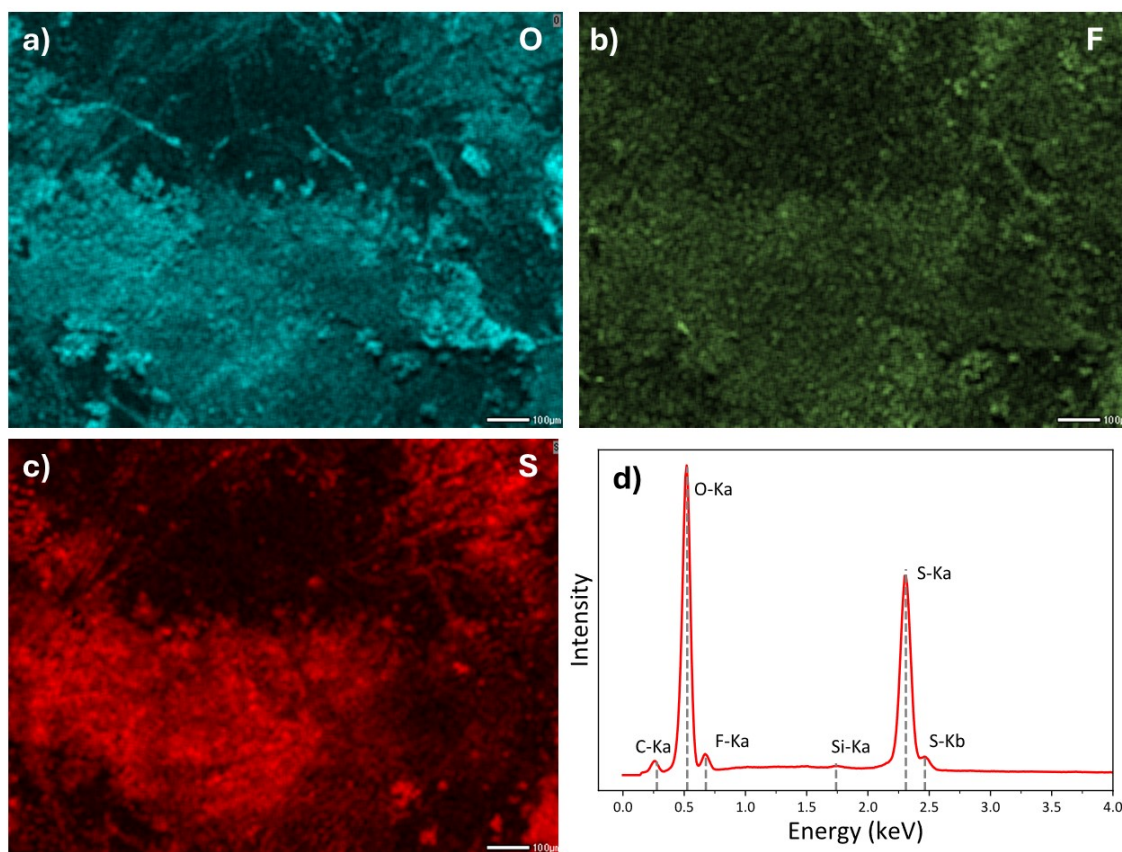

**Fig. S10** (a-c) Elemental maps of Li anode from a cell containing no MTFSI (Fig. 4a): (a) Oxygen; (b) Fluorine; (c) Sulfur. (d) EDX spectrum from sample shown in Fig. 4a

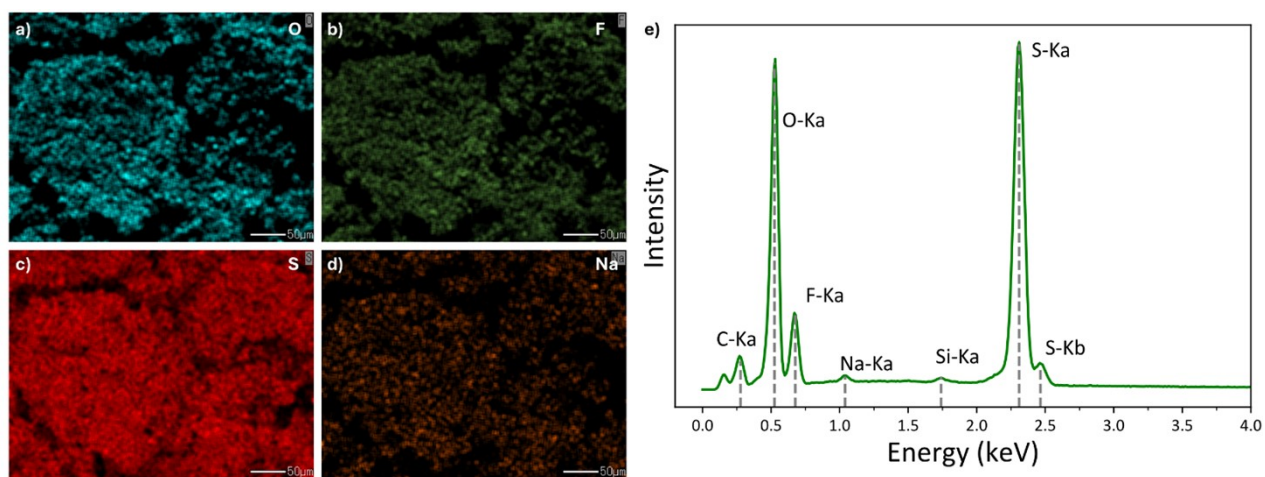

**Fig. S11** (a-d) Elemental maps of Li anode from a cell containing NaTFSI (Fig. 4b): (a) Oxygen; (b) Fluorine; (c) Sulfur; (d) Sodium. (e) EDX spectrum from sample shown in Fig. 4b

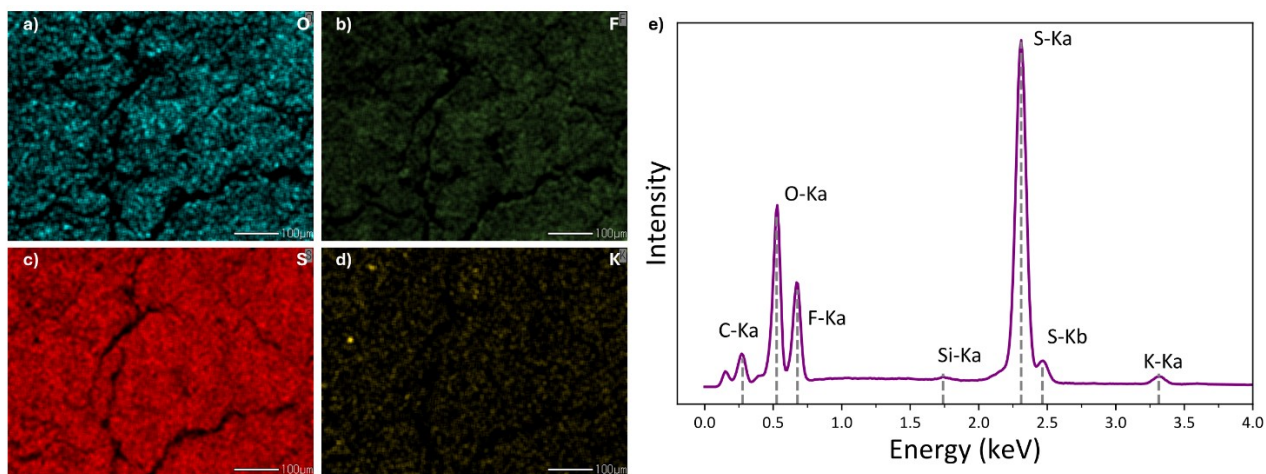

**Fig. S12** (a-d) Elemental maps of Li anode from a cell containing KTFSI (Fig. 4c): (a) Oxygen; (b) Fluorine; (c) Sulfur; (d) Potassium. (e) EDX spectrum from sample shown in Fig. 4c

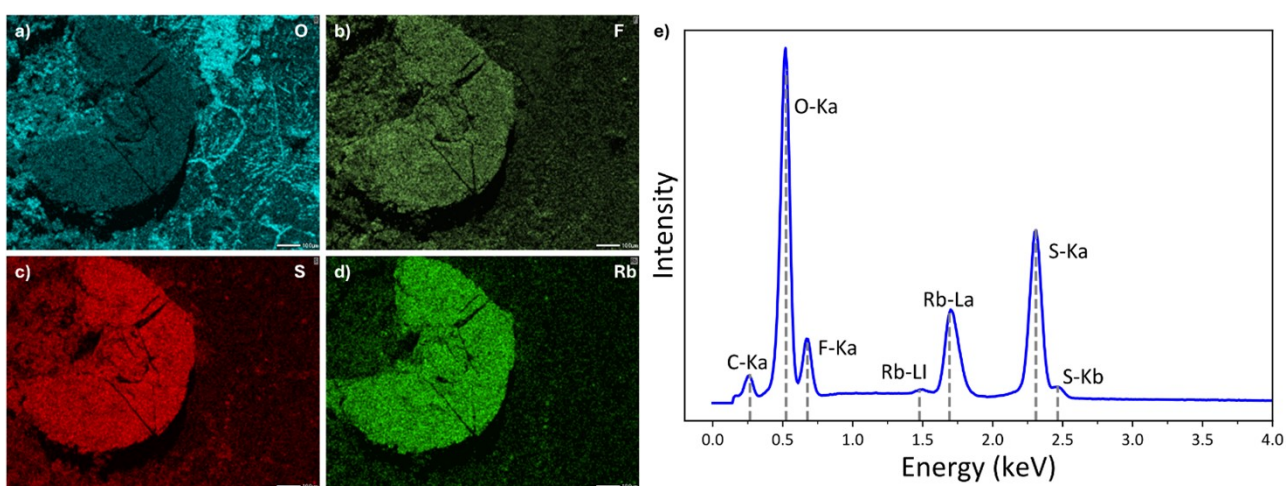

**Fig. S13** (a-d) Elemental maps of Li anode from a cell containing RbTFSI (Fig. 4d): (a) Oxygen; (b) Fluorine; (c) Sulfur; (d) Rubidium. (e) EDX spectrum from sample shown in Fig. 4d

## 7. Carbon Felt Cathode - SEM-EDX Images & Spectra

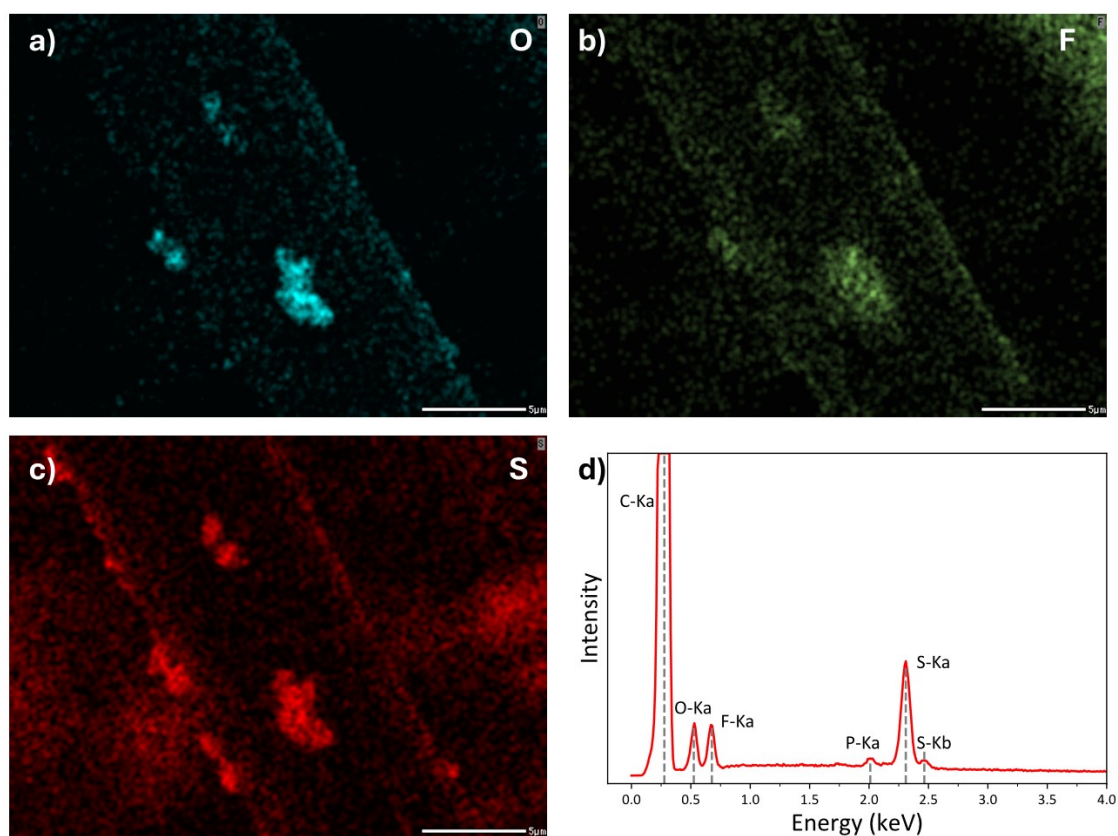

**Fig. S14** (a-c) Elemental maps of C Cathode from a cell containing no MTFSI (Fig. 5a): (a) Oxygen; (b) Fluorine; (c) Sulfur. (d) EDX spectrum from sample shown in Fig. 5a

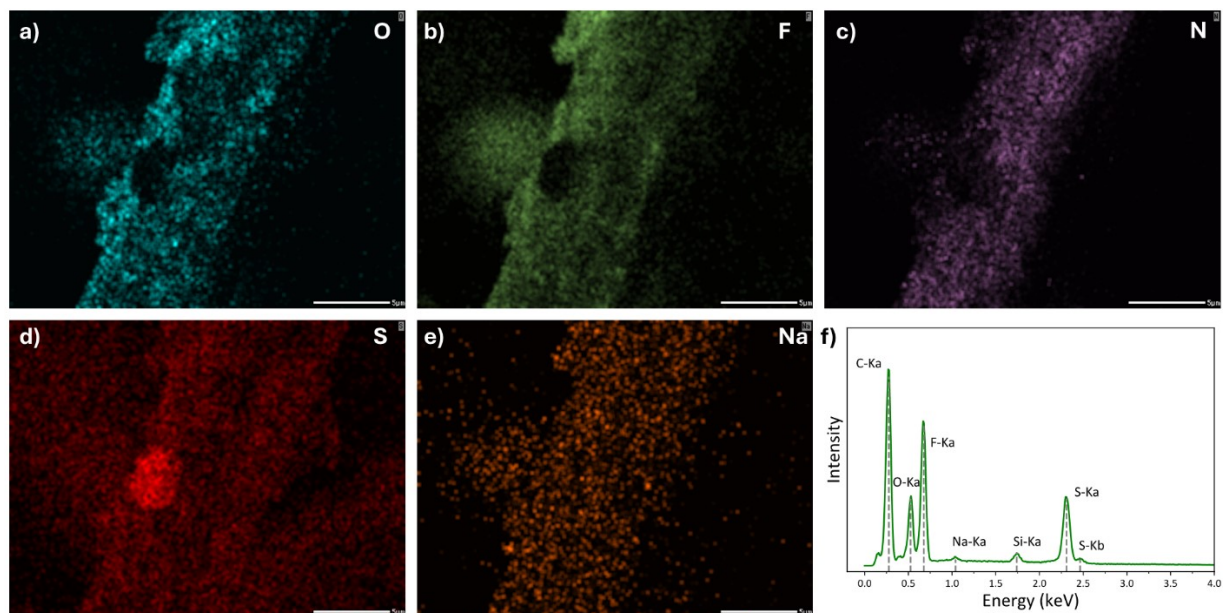

**Fig. S15** (a-e) Elemental maps of C Cathode from a cell containing NaTFSI (Fig. 5b): (a) Oxygen; (b) Fluorine; (c) Nitrogen; (d) Sulfur; (e) Sodium. (f) EDX spectrum from sample shown in Fig. 5b

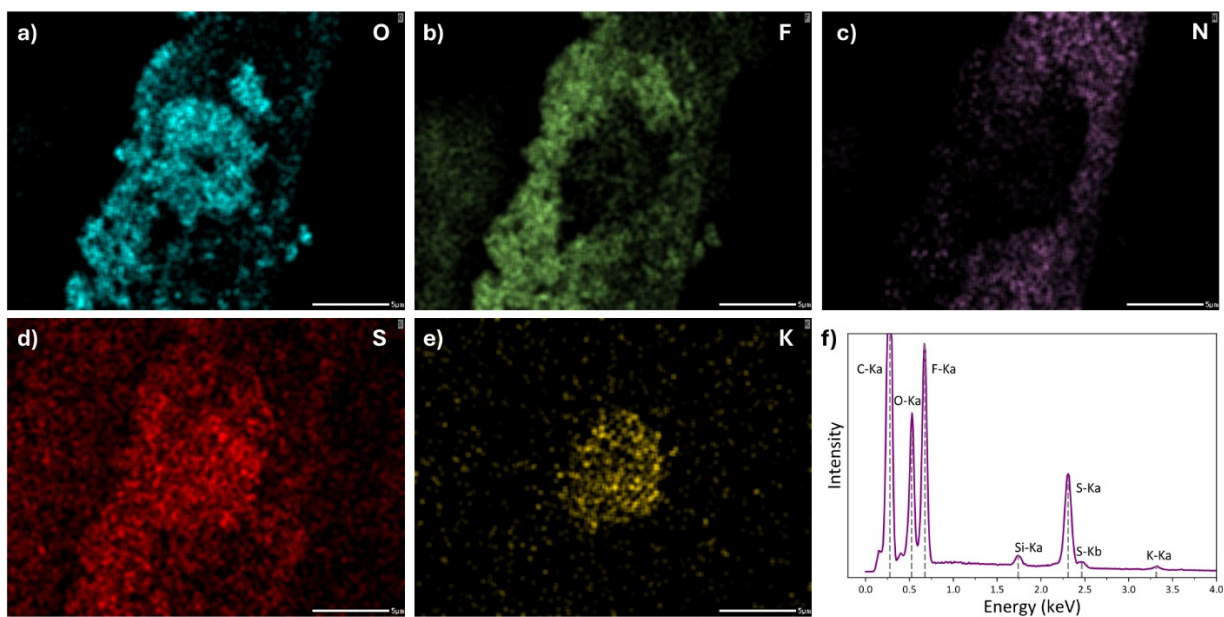

**Fig. S16** (a-e) Elemental maps of C Cathode from a cell containing KTFSI (Fig. 5c): (a) Oxygen; (b) Fluorine; (c) Nitrogen; (d) Sulfur; (e) Potassium. (f) EDX spectrum from sample shown in Fig. 5c

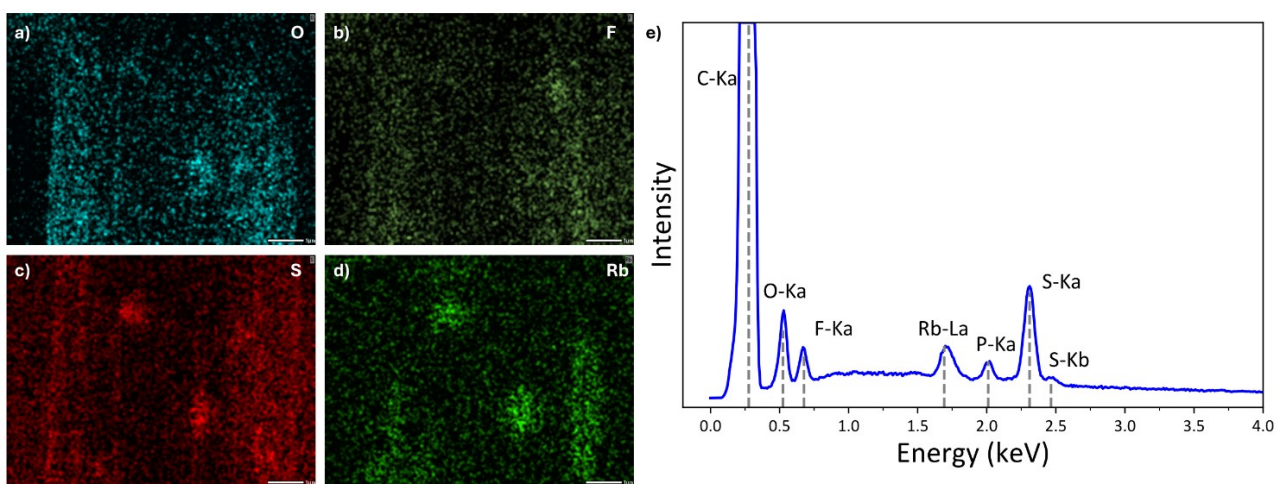

**Fig. S17** (a-d) Elemental maps of C Cathode from a cell containing RbTFSI (Fig. 5d): (a) Oxygen; (b) Fluorine; (c) Sulfur; (d) Rubidium. (e) EDX spectrum from sample shown in Fig. 5d
